# Supplementary material for: Viral and Genomic Drivers of Squamous Cell Neoplasms Arising in the Lacrimal Drainage System
Source: MDPI journal article supplement (doi:10.3390/cancers14102558), 2022-05-23

# Viral and genomic drivers of epithelial neoplasms arising in the lacrimal drainage system

## Supplementary Material

### Supplementary Legends

**Supplementary Table 1:** The 523 genes included in the TruSight Oncology (TSO500) Gene Panel (Illumina, San Diego, CA, USA).

**Supplementary Table 2:** Ingenuity Variant Analysis filtering criteria (based on the TSO500 default filtering)

**Supplementary Table 3:** All annotated variants.

**Supplementary Table 4:** Studies reporting on Human papillomavirus (HPV) in inverted papillomas of the lacrimal drainage system.

**Supplementary Figure 1:** The PI3K-signalling cascade, simplified. Created with BioRender.com.

### Supplementary Tables

#### Supplementary Table 1

|         |        |       |          |        |         |        |
|---------|--------|-------|----------|--------|---------|--------|
| ABL1    | CDKN2C | FAS   | HOXB13   | MRE11A | PPARG   | SOX2   |
| ABL2    | CEBPA  | FAT1  | HRAS     | MSH2   | PPM1D   | SOX9   |
| ACVR1   | CENPA  | FBXW7 | HSD3B1   | MSH3   | PPP2R1A | SPEN   |
| ACVR1B  | CHD2   | FGF1  | HSP90AA1 | MSH6   | PPP2R2A | SPOP   |
| AKT1    | CHD4   | FGF10 | ICOSLG   | MST1   | PPP6C   | SPTA1  |
| AKT2    | CHEK1  | FGF14 | ID3      | MST1R  | PRDM1   | SRC    |
| AKT3    | CHEK2  | FGF19 | IDH1     | MTOR   | PREX2   | SRSF2  |
| ALK     | CIC    | FGF2  | IDH2     | MUTYH  | PRKAR1A | STAG1  |
| ALOX12B | CREBBP | FGF23 | IFNGR1   | MYB    | PRKCI   | STAG2  |
| ANKRD11 | CRKL   | FGF3  | IGF1     | MYC    | PRKDC   | STAT3  |
| ANKRD26 | CRLF2  | FGF4  | IGF1R    | MYCL1  | PRSS8   | STAT4  |
| APC     | CSF1R  | FGF5  | IGF2     | MYCN   | PTCH1   | STAT5A |
| AR      | CSF3R  | FGF6  | IKBKE    | MYD88  | PTEN    | STAT5B |

|         |         |        |        |        |         |          |
|---------|---------|--------|--------|--------|---------|----------|
| ARAF    | CSNK1A1 | FGF7   | IKZF1  | MYOD1  | PTPN11  | STK11    |
| ARFRP1  | CTCF    | FGF8   | IL10   | NAB2   | PTPRD   | STK40    |
| ARID1A  | CTLA4   | FGF9   | IL7R   | NBN    | PTPRS   | SUFU     |
| ARID1B  | CTNNA1  | FGFR1  | INHA   | NCOA3  | PTPRT   | SUZ12    |
| ARID2   | CTNNB1  | FGFR2  | INHBA  | NCOR1  | QKI     | SYK      |
| ARID5B  | CUL3    | FGFR3  | INPP4A | NEGR1  | RAB35   | TAF1     |
| ASXL1   | CUX1    | FGFR4  | INPP4B | NF1    | RAC1    | TBX3     |
| ASXL2   | CXCR4   | FH     | INSR   | NF2    | RAD21   | TCEB1    |
| ATM     | CYLD    | FLCN   | IRF2   | NFE2L2 | RAD50   | TCF3     |
| ATR     | DAXX    | FLI1   | IRF4   | NFKBIA | RAD51   | TCF7L2   |
| ATRX    | DCUN1D1 | FLT1   | IRS1   | NKX2-1 | RAD51B  | TERC     |
| AURKA   | DDR2    | FLT3   | IRS2   | NKX3-1 | RAD51C  | TERT     |
| AURKB   | DDX41   | FLT4   | JAK1   | NOTCH1 | RAD51D  | TET1     |
| AXIN1   | DHX15   | FOXA1  | JAK2   | NOTCH2 | RAD52   | TET2     |
| AXIN2   | DICER1  | FOXL2  | JAK3   | NOTCH3 | RAD54L  | TFE3     |
| AXL     | DIS3    | FOXO1  | JUN    | NOTCH4 | RAF1    | TFRC     |
| B2M     | DNAJB1  | FOXP1  | KAT6A  | NPM1   | RANBP2  | TGFBR1   |
| BAP1    | DNMT1   | FRS2   | KDM5A  | NRAS   | RARA    | TGFBR2   |
| BARD1   | DNMT3A  | FUBP1  | KDM5C  | NRG1   | RASA1   | TMEM127  |
| BBC3    | DNMT3B  | FYN    | KDM6A  | NSD1   | RB1     | TMPRSS2  |
| BCL10   | DOT1L   | GABRA6 | KDR    | NTRK1  | RBM10   | TNFAIP3  |
| BCL2    | E2F3    | GATA1  | KEAP1  | NTRK2  | RECQL4  | TNFRSF14 |
| BCL2L1  | EED     | GATA2  | KEL    | NTRK3  | REL     | TOP1     |
| BCL2L11 | EGFL7   | GATA3  | KIF5B  | NUP93  | RET     | TOP2A    |
| BCL2L2  | EGFR    | GATA4  | KIT    | NUTM1  | RFWD2   | TP53     |
| BCL6    | EIF1AX  | GATA6  | KLF4   | PAK1   | RHEB    | TP63     |
| BCOR    | EIF4A2  | GEN1   | KLHL6  | PAK3   | RHOA    | TRAF2    |
| BCORL1  | EIF4E   | GID4   | KMT2B  | PAK7   | RICTOR  | TRAF7    |
| BCR     | EML4    | GLI1   | KMT2C  | PALB2  | RIT1    | TSC1     |
| BIRC3   | EP300   | GNA11  | KMT2D  | PARK2  | RNF43   | TSC2     |
| BLM     | EPCAM   | GNA13  | KRAS   | PARP1  | ROS1    | TSHR     |
| BMPR1A  | EPHA3   | GNAQ   | LAMP1  | PAX3   | RPS6KA4 | U2AF1    |

|          |         |           |         |          |         |        |
|----------|---------|-----------|---------|----------|---------|--------|
| BRAF     | EPHA5   | GNAS      | LATS1   | PAX5     | RPS6KB1 | VEGFA  |
| BRCA1    | EPHA7   | GPR124    | LATS2   | PAX7     | RPS6KB2 | VHL    |
| BRCA2    | EPHB1   | GPS2      | LMO1    | PAX8     | RPTOR   | VTN1   |
| BRD4     | ERBB2   | GREM1     | LRP1B   | PBRM1    | RUNX1   | WISP3  |
| BRIP1    | ERBB3   | GRIN2A    | LYN     | PDCD1    | RUNX1T1 | WT1    |
| BTG1     | ERBB4   | GRM3      | LZTR1   | PDCD1LG2 | RYBP    | XIAP   |
| BTK      | ERCC1   | GSK3B     | MAGI2   | PDGFRA   | SDHA    | XPO1   |
| C11orf30 | ERCC2   | H3F3A     | MALT1   | PDGFRB   | SDHAF2  | XRCC2  |
| CALR     | ERCC3   | H3F3B     | MAP2K1  | PK1      | SDHB    | YAP1   |
| CARD11   | ERCC4   | H3F3C     | MAP2K2  | PDPK1    | SDHC    | YES1   |
| CASP8    | ERCC5   | HGF       | MAP2K4  | PGR      | SDHD    | ZBTB2  |
| CBFB     | ERG     | HIST1H1C  | MAP3K1  | PHF6     | SETBP1  | ZBTB7A |
| CBL      | ERRF1   | HIST1H2BD | MAP3K13 | PHOX2B   | SETD2   | ZFHX3  |
| CCND1    | ESR1    | HIST1H3A  | MAP3K14 | PIK3C2B  | SF3B1   | ZNF217 |
| CCND2    | ETS1    | HIST1H3B  | MAP3K4  | PIK3C2G  | SH2B3   | ZNF703 |
| CCND3    | ETV1    | HIST1H3C  | MAPK1   | PIK3C3   | SH2D1A  | ZRSR2  |
| CCNE1    | ETV4    | HIST1H3D  | MAPK3   | PIK3CA   | SHQ1    |        |
| CD274    | ETV5    | HIST1H3E  | MAX     | PIK3CB   | SLIT2   |        |
| CD276    | ETV6    | HIST1H3F  | MCL1    | PIK3CD   | SLX4    |        |
| CD74     | EWSR1   | HIST1H3G  | MDC1    | PIK3CG   | SMAD2   |        |
| CD79A    | EZH2    | HIST1H3H  | MDM2    | PIK3R1   | SMAD3   |        |
| CD79B    | FAM123B | HIST1H3I  | MDM4    | PIK3R2   | SMAD4   |        |
| CDC73    | FAM175A | HIST1H3J  | MED12   | PIK3R3   | SMARCA4 |        |
| CDH1     | FAM46C  | HIST2H3A  | MEF2B   | PIM1     | SMARCB1 |        |
| CDK12    | FANCA   | HIST2H3C  | MEN1    | PLCG2    | SMARCD1 |        |
| CDK4     | FANCC   | HIST2H3D  | MET     | PLK2     | SMC1A   |        |
| CDK6     | FANCD2  | HIST3H3   | MGA     | PMAIP1   | SMC3    |        |
| CDK8     | FANCE   | HLA-A     | MITF    | PMS1     | SMO     |        |
| CDKN1A   | FANCF   | HLA-B     | MLH1    | PMS2     | SNCAIP  |        |
| CDKN1B   | FANCG   | HLA-C     | MLL     | PNRC1    | SOC1    |        |
| CDKN2A   | FANCI   | HNF1A     | MLLT3   | POLD1    | SOX10   |        |
| CDKN2B   | FANCL   | HNRNPK    | MPL     | POLE     | SOX17   |        |

**Supplementary Table 2**

| <b>Filter</b>         | <b>Inclusion criteria</b>                                                            |
|-----------------------|--------------------------------------------------------------------------------------|
| Confidence            | Call quality > 20                                                                    |
|                       | Variant passed upstream pipeline filtering                                           |
|                       | Read depth > 100                                                                     |
|                       | Allele fraction > 10                                                                 |
|                       | Outside top 5% most exonically variable 100base windows in healthy public genomes    |
|                       | Outside top 1% most exonically variable genes in healthy public genomes (100Genomes) |
| Common variants       | <1% of all in gnomAD                                                                 |
|                       | <1% of all in ExAc                                                                   |
|                       | <1% of all in NHLBI ESP exomes                                                       |
|                       | <1% of all in the 1000 Genomes Project                                               |
| Predicted deleterious | Pathogenic variants (ACMG Guidelines classification)                                 |
|                       | Likely pathogenic variants (ACMG Guidelines classification)                          |
|                       | Uncertain significance (ACMG Guidelines classification)                              |
|                       | Variants listed in HGMD, ClinVar, CentoMD                                            |
|                       | Variants established in the literature                                               |

Supplementary Table 3

| Sample | HPV DNA  | HPV E6/E7 | p16      | HPV genotype | Diagnosis | Read depth | Chromosome location | Gene          | AA Change    | Transcript     | Nucleotide change                                                                                                                                                              | Translational impact | Variant allele | Computed classification* |
|--------|----------|-----------|----------|--------------|-----------|------------|---------------------|---------------|--------------|----------------|--------------------------------------------------------------------------------------------------------------------------------------------------------------------------------|----------------------|----------------|--------------------------|
| 1      | Positive | Positive  | Positive | HPV11        | NKSCC     | 229        | chr3:30713499       | <i>TGFBR2</i> | p.A275E      | NM_003242.6    | c.824C>A                                                                                                                                                                       | Gain                 | 61             | Uncertain                |
|        |          |           |          |              |           | 181        | chr22:23653975      | <i>BCR</i>    | p.V1050fs*17 | NM_021574.3    | c.3143_3146dupCC                                                                                                                                                               | Loss                 | 14             | Uncertain                |
| 2      | Positive | Positive  | Negative | HPV11        | NKSCC     | 238        | chrX:39913571       | <i>BCOR</i>   | NA           | NM_017745.6    | c.4640-105_4655delTCCA<br>GCCTGTCATGAAT<br>GTATAGGAAAAA<br>ATGCCACGTGGCT<br>CTGCCATCATTTTG<br>TTCTCAGCAGTAG<br>ATTTTATCTTGTTT<br>TTTTATTTTCTCT<br>CCCTCCAGATTATT<br>TAAATGACCT | Loss                 | 18             | Likely pathogenic        |
|        |          |           |          |              |           | 318        | chr17:7576855       | <i>TP53</i>   | p.Q331*      | NM_000546.6    | c.991C>T                                                                                                                                                                       | Loss                 | 30             | Pathogenic               |
|        |          |           |          |              |           | 231        | chr9:139401863      | <i>NOTCH1</i> | p.N1179fs*4  | NM_017617.5    | c.3536dupA                                                                                                                                                                     | Loss                 | 26             | Uncertain                |
|        |          |           |          |              |           | 353        | chrX:44929416       | <i>KDM6A</i>  | p.N839fs*6   | NM_021140.4    | c.2517_2518delC<br>A                                                                                                                                                           | Loss                 | 24             | Likely pathogenic        |
|        |          |           |          |              |           | 236        | chr22:23653975      | <i>BCR</i>    | p.V1050fs*17 | NM_021574.3    | c.3143_3146dupC<br>CGG                                                                                                                                                         | Loss                 | 10             | Uncertain                |
| 3      | Positive | Positive  | Negative | HPV11        | NKSCC     | 218        | chr1:120462032      | <i>NOTCH2</i> | p.R1895H     | NM_024408.4    | c.5684G>A                                                                                                                                                                      | NA                   | 47             | Uncertain                |
|        |          |           |          |              |           | 306        | chr3:30713506       | <i>TGFBR2</i> | p.K277N      | NM_003242.6    | c.831G>T                                                                                                                                                                       | Gain                 | 63             | Uncertain                |
|        |          |           |          |              |           | 147        | chr7:106526601      | <i>PIK3CG</i> | p.F965S      | NM_002649.3    | c.2894T>C                                                                                                                                                                      | Loss                 | 53             | Uncertain                |
|        |          |           |          |              |           | 214        | chr17:47696716      | <i>SPOP</i>   | p.E78K       | NM_003563.3    | c.232G>A                                                                                                                                                                       | Loss                 | 26             | Likely pathogenic        |
| 4      | Negative | Negative  | Negative | NA           | NKSCC     | 454        | chr12:49448470      | <i>KMT2D</i>  | p.E81*       | NM_003482.4    | c.241G>T                                                                                                                                                                       | Loss                 | 36             | Likely pathogenic        |
|        |          |           |          |              |           | 417        | chr12:49444974      | <i>KMT2D</i>  | p.S831*      | NM_003482.4    | c.2492C>G                                                                                                                                                                      | Loss                 | 33             | Likely pathogenic        |
|        |          |           |          |              |           | 349        | chr17:7579579       | <i>TP53</i>   | p.S37fs*7    | NM_000546.6    | c.108delG                                                                                                                                                                      | Frameshift           | 55             | Likely pathogenic        |
| 5      | Positive | Positive  | Positive | HPV16        | SCC       | 101        | chr3:30691871       | <i>TGFBR2</i> | p.P129fs*3   | NM_003242.6    | c.383dupA                                                                                                                                                                      | Loss                 | 10             | Uncertain                |
|        |          |           |          |              |           | 314        | chr11:22647208      | <i>FANCF</i>  | p.R50L       | NM_022725.4    | c.149G>T                                                                                                                                                                       | NA                   | 25             | Uncertain                |
|        |          |           |          |              |           | 1071       | chr15:90631914      | <i>IDH2</i>   | p.V147I      | NM_002168.4    | c.439G>A                                                                                                                                                                       | NA                   | 61             | Uncertain                |
|        |          |           |          |              |           | 654        | chr22:23653975      | <i>BCR</i>    | p.V1050fs*17 | NM_021574.3    | c.3143_3146dupC<br>CGG                                                                                                                                                         | Loss                 | 15             | Uncertain                |
| 6      | Positive | Positive  | Positive | HPV16        | SCC       | 902        | chr5:67591211       | <i>PIK3R1</i> | NA           | NM_181523.3    | c.1746-35_1748delAGTT<br>AATGCGTTCTCTTT<br>TCAAAACTGTTTTT<br>CAGGTG                                                                                                            | Loss                 | 17             | Likely pathogenic        |
|        |          |           |          |              |           | 361        | chr16:72822574      | <i>ZFHX3</i>  | p.Q3201*     | NM_001164766.2 | c.9601C>T                                                                                                                                                                      | Loss                 | 40             | Likely pathogenic        |

| Sample | HPV DNA  | HPV<br>E6/E7 | p16      | HPV<br>genotype | Diagnosis   | Read depth | Chromosome<br>location | Gene   | AA Change    | Transcript     | Nucleotide<br>change | Translational<br>impact | Variant<br>allele | Computed<br>classification* |
|--------|----------|--------------|----------|-----------------|-------------|------------|------------------------|--------|--------------|----------------|----------------------|-------------------------|-------------------|-----------------------------|
| 7      | Positive | Positive     | Positive | HPV16           | SCC         | 140        | chr3:178936082         | PIK3CA | p.E542K      | NM_006218.4    | c.1624G>A            | Gain                    | 36                | Pathogenic                  |
| 8      | Positive | Positive     | Positive | HPV16           | SCC         | 174        | chr3:178936091         | PIK3CA | p.E545K      | NM_006218.4    | c.1633G>A            | Gain                    | 40                | Pathogenic                  |
|        |          |              |          |                 |             | 131        | chr13:49027168         | RB1    | p.R579*      | NM_000321.3    | c.1735C>T            | Loss                    | 21                | Pathogenic                  |
|        |          |              |          |                 |             |            |                        |        |              |                | c.4925_4927delC      |                         |                   |                             |
|        |          |              |          |                 |             | 102        | chr16:3781324          | CREBBP | p.S1642del   | NM_001079846.1 | CT                   | Loss                    | 25                | Pathogenic                  |
|        |          |              |          |                 |             | 112        | chr11:108206607        | ATM    | p.Q2729H     | NM_000051.4    | c.8187A>T            | Loss                    | 21                | Likely pathogenic           |
| 9      | Positive | Positive     | Positive | HPV16           | SCC         |            |                        |        |              |                | c.6414_6415delA      |                         |                   |                             |
|        |          |              |          |                 |             | 142        | chr1:16259147          | SPEN   | p.S2139*     | NM_015001.3    | A                    | Loss                    | 24                | Likely pathogenic           |
|        |          |              |          |                 |             |            |                        |        |              |                | c.4896_4897delA      |                         |                   |                             |
|        |          |              |          |                 |             | 139        | chr1:16257629          | SPEN   | p.K1632fs*28 | NM_015001.3    | A                    | Loss                    | 20                | Likely pathogenic           |
|        |          |              |          |                 |             | 127        | chr3:178916957         | PIK3CA | p.R115L      | NM_006218.4    | c.344G>T             | Gain                    | 17                | Pathogenic                  |
| 10     | Positive | Positive     | Positive | HPV16           | SCC         |            |                        |        |              |                | c.2019_2022delC      |                         |                   |                             |
|        |          |              |          |                 |             | 113        | chr5:67593270          | PIK3R1 | p.N673fs*18  | NM_181523.3    | AAA                  | Loss                    | 38                | Likely pathogenic           |
|        |          |              |          |                 |             | 273        | chr4:1803568           | FGFR3  | p.S249C      | NM_000142.5    | c.746C>G             | Gain                    | 37                | Pathogenic                  |
|        |          |              |          |                 |             | 141        | chr1:27023696          | ARID1A | p.Q268*      | NM_006015.6    | c.802C>T             | Loss                    | 72                | Likely pathogenic           |
|        |          |              |          |                 |             | 619        | chr12:46231185         | ARID2  | p.L370*      | NM_152641.4    | c.1109delT           | Loss                    | 33                | Likely pathogenic           |
| 11     | Positive | Positive     | Positive | HPV16           | SCC         | 971        | chr14:105246551        | AKT1   | p.E17K       | NM_005163.2    | c.49G>A              | Gain                    | 42                | Pathogenic                  |
|        |          |              |          |                 |             | 493        | chr4:1803568           | FGFR3  | p.S249C      | NM_000142.5    | c.746C>G             | Gain                    | 12                | Pathogenic                  |
|        |          |              |          |                 |             | 1142       | chr5:112175211         | APC    | p.I1307K     | NM_000038.6    | c.3920T>A            | Loss                    | 50                | Pathogenic                  |
|        |          |              |          |                 |             |            |                        |        |              |                |                      |                         |                   |                             |
| 12**   | Negative | Negative     | Negative | NA              | SCC         | NA         | NA                     | NA     | NA           | NA             | NA                   | NA                      | NA                | NA                          |
| 13     | Negative | Negative     | Negative | NA              | Adenocarcin | 531        | chr17:29677208         | NF1    | p.T2423fs*4  | NM_000267.3    | c.7267dupA           | Loss                    | 28                | Likely pathogenic           |
|        |          |              |          |                 |             | 631        | chr17:7577085          | TP53   | p.E285K      | NM_000546.6    | c.853G>A             | Loss                    | 26                | Pathogenic                  |

\* Computed classification of pathogenicity by Qiagen Interpret, USA, based on: Richards S, Aziz N, Bale S, Bick D, Das S, Gastier-Foster J, Grody WW, Hegde M, Lyon E, Spector E, Voelkerding K, Rehm HL; ACMG Laboratory Quality Assurance Committee. Standards and guidelines for the interpretation of sequence variants: a joint consensus recommendation of the American College of Medical Genetics and Genomics and the Association for Molecular Pathology. Genet Med. 2015 May;17(5):405-24. doi: 10.1038/gim.2015.30. Epub 2015 Mar 5. PMID: 25741868; PMCID: PMC4544753.

| Study                                    | N (cases) | Median age (range) | Gender           | HPV positive (%)   | HPV genotype                                               | HPV detection modality           | Recurrence                                              | Malignant transformation |
|------------------------------------------|-----------|--------------------|------------------|--------------------|------------------------------------------------------------|----------------------------------|---------------------------------------------------------|--------------------------|
| Wang <i>et al.</i> 2021 <sup>1</sup>     | 13        | 57 (43-84)         | 7M / 6F          | 2 / 9 (22)         | HPV16, 18, 31, 33, 51                                      | Unknown                          | 2 / 13, median follow-up 48 months (range 2 - 241)      | 4 / 13 (44)              |
| Jones <i>et al.</i> 2020 <sup>2</sup>    | 2         | NA                 | NA               | 2 / 2 (100)        | 11, 16                                                     | HPV DNA PCR                      | NA                                                      | NA                       |
| Raemdock <i>et al.</i> 2009 <sup>3</sup> | 1         | 24                 | F                | 1 / 1              | Low-risk                                                   | HPV DNA ISH                      | 0 / 1 (follow-up 2 years)                               | 0 / 1                    |
| Present study                            | 5         | 52 (45-56)         | 2M / 3F          | 3 / 4 (75)         | HPV11, 16                                                  | HPV DNA PCR, p16, E6/E7 mRNA ISH | 2 / 6, median follow up time 96 months (range 2 - 176)  | 2 / 6 (33)               |
| <b>Total</b>                             | <b>22</b> | <b>55 (24-84)</b>  | <b>10M / 10F</b> | <b>8 / 16 (50)</b> | <b>Low-risk: HPV11<br/>High-risk: HPV16,18, 31, 33, 51</b> |                                  | <b>4 / 20, median follow-up 48 months (range 2-241)</b> | <b>6 / 20 (32)</b>       |

#### Supplementary Table 4

1. J. Wang, J. Ford, B. Esmali, P. Langer, N. Esmaili, G. J. Griepentrog, et al. *Inverted papilloma of the orbit and nasolacrimal system*. Ophthalmic Plast Reconstr Surg 2021 Vol. 37 Issue 2 Pages 161-167. DOI: 10.1097/iop.0000000000001719.

2. H. Jones, S. Gane, J. Rimmer, K. Cuschieri and V. J. Lund. *HPV may not play a role in all lacrimal transitional cell papilloma*. Rhinology 2020 Vol. 10.4193/Rhin19.283. DOI: 10.4193/Rhin19.283

3. T. Y. Raemdonck, C. M. Van den Broecke, I. Claerhout and C. E. Decock. *Inverted papilloma arising primarily from the lacrimal sac*. Orbit 2009 Vol. 28 Issue 2-3 Pages 181-4. DOI: 10.1080/01676830802692914

## Supplementary Figures

### Supplementary Figure 1

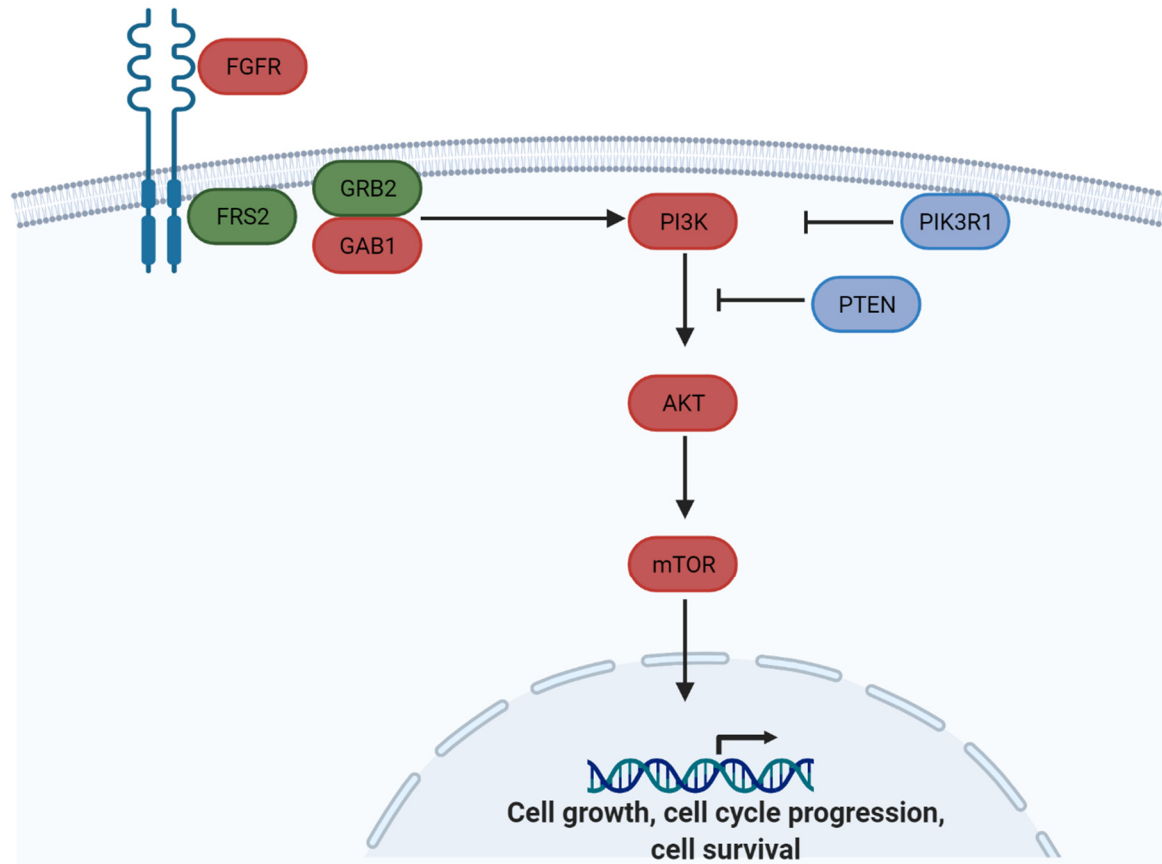

Supplement: s1 [file s1]
